# Supplementary material
Source: publisher figshare collection journal article supplement (https://acs.figshare.com/ndownloader/files/5882091)
Supplement: Supplementary file 1 [file 5882091]

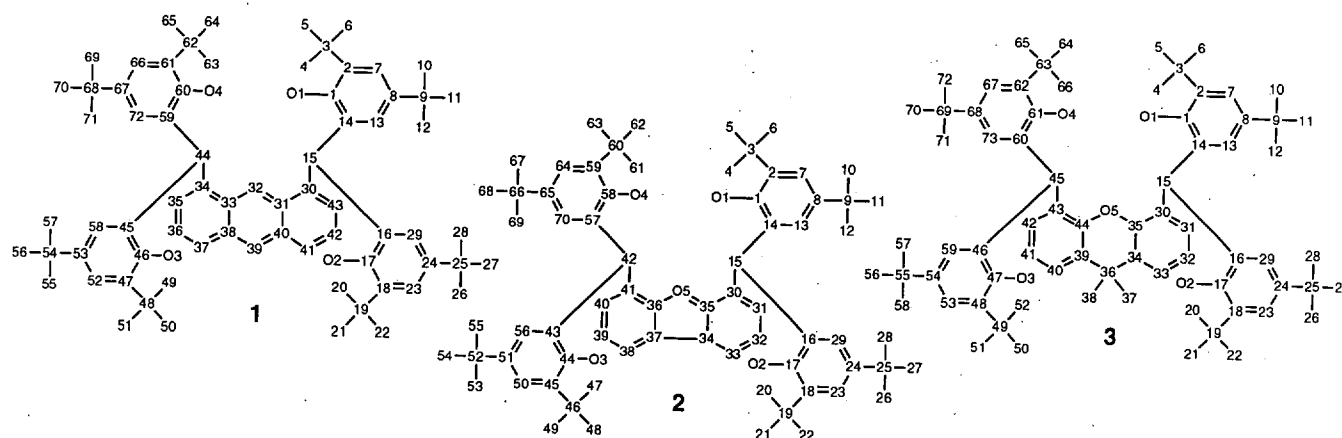

Complete numbering scheme for X-ray structures 1-3

### X-ray-Crystallgraphy

Unit cell dimensions and intensity data (Tables 1, 2, and 3) for all the structures were obtained on a Siemens CCD SMART diffractometer at  $-100\text{ }^{\circ}\text{C}$ , with monochromatic  $\text{Mo-K}\alpha$  X-rays ( $\lambda = 0.71073\text{ \AA}$ ). The data collections nominally covered over a hemisphere of reciprocal space, by a combination of three sets of exposures; each set had a different  $\phi$  angle for the crystal and each exposure covered  $0.3^{\circ}$  in  $\omega$ . The crystal to detector distance was 5.0 cm. The data sets were corrected empirically for absorption using SADABS.<sup>1</sup> All the structures were solved using the Bruker SHELXTL software package for the PC, using the direct methods option of SHELXS. The space groups for all of the structures were determined from an examination of the systematic absences in the data, and the successful solution and refinement of the structures confirmed these assignments. Except for the phenolic hydrogen and bridging methyl hydrogen atoms, all hydrogen atoms were assigned idealized locations and were given a thermal parameter

equivalent to 1.2 or 1.5 times the thermal parameter of the carbon atom to which it was attached. For the methyl groups, where the location of the hydrogen atoms was uncertain, the AFIX 137 card was used to allow the hydrogen atoms to rotate to the maximum area of residual density, while fixing their geometry. In several cases, the crystals contained severely disordered solvate molecules and in instances where a suitable model could not be constructed for the solvates, their contribution to the diffraction were removed ("squeezed") from the data by the Platon for Windows software program.

**1**•C<sub>5</sub>H<sub>12</sub>·2H<sub>2</sub>O: Single crystals were grown from the evaporation of a saturated pentane solution at room temperature. The structure has been reported and complete experimental data is available in the supplementary material for the previous publication.<sup>2</sup> Unit cell parameters are reported in Table 1.

**2**•2.75CH<sub>3</sub>CN: Single crystals were grown from the evaporation of a saturated Et<sub>2</sub>O/CH<sub>3</sub>CN mixture at room temperature. One phenolic arm was disordered with the oxygen atom residing in two unique positions with site occupancies of 0.85 and 0.15. The dominate position was orientated toward the center of the molecule. The phenolic hydrogens were found in the Fourier difference maps and refined isotropically. Several of the *t*-butyl groups were disordered across two distinct positions with several different occupancy factors. Unit cell parameters are reported in Table 1.

**3**: Single crystals were grown from the evaporation of a saturated Et<sub>2</sub>O mixture at room temperature. The phenolic hydrogens were found in the Fourier difference maps and refined isotropically. One phenolic arm was disordered with the oxygen atom residing in two unique positions with site occupancies of 0.85 and 0.15. The dominate position was orientated toward

the center of the molecule. Several of the *t*-butyl groups were disordered across two distinct positions with several different occupancy factors. Unit cell parameters are reported in Table 1.

**4•C<sub>5</sub>H<sub>12</sub>:** Single crystals were grown from the evaporation of a saturated pentane solution at room temperature. The phenolic hydrogens were found in the Fourier difference maps and refined isotropically. One *t*-butyl group was occupied two distinct orientations with site occupancy factors of 0.5. The pentane solvate was severely disordered and the carbon atoms Unit cell parameters are reported in Table 1.

**5•3(Me)<sub>2</sub>CO:** Single crystals were grown from a saturated acetone solution at room temperature. Disordered solvates were removed ("squeezed") from the data by the Platon for Windows software program. All disordered *tert*-butyl groups were modeled over two positions and refined with appropriate site occupancy factors. The phenolic hydrogens were found in the Fourier difference maps and refined isotropically. Unit cell parameters are reported in Table 2.

**6•2C<sub>5</sub>H<sub>12</sub>:** Single crystals were grown from a saturated pentane solution at -35°C. The structure has been reported and complete experimental data is available in the supplementary material for the previous publication. Unit cell parameters are reported in Table 2.

**7•3CH<sub>2</sub>Cl<sub>2</sub>:** Single crystals were grown from a concentrated methylene chloride solution at -35°C. The hydrogens attached to the bridging alkyl groups were found in the Fourier difference maps and refined isotropically. Unit cell parameters are reported in Table 2.

**8•3CH<sub>2</sub>Cl<sub>2</sub>:** Single crystals were grown from a saturated methylene chloride solution at room temperature. One severely disordered methylene chloride molecule was removed ("squeezed") from the data by the Platon for Windows software program. The remaining two solvates were well ordered. Two of *tert*-butyl groups occupied equally two distinct positions. Unit cell information is located in Table 2.

**9·3C<sub>5</sub>H<sub>12</sub>:** Single crystals were grown from a concentrated pentane solution at -35°C. One *tert*-butyl group was refined isotropically. Two of the three pentane molecules, C(75)-C(84), were refined with partial site occupancy. Unit cell parameters are reported in Table 2.

**10·C<sub>5</sub>H<sub>12</sub>·CH<sub>2</sub>Cl<sub>2</sub>:** Single crystals were grown from a pentane-methylene chloride diffusion at -35°C. A disordered pentane and dichloromethane solvate were both removed ("squeezed") from the data by the Platon for Windows software program. One of the *tert*-butyl group was modelled with two orientations and was isotropically refined with site occupancy factors of 0.5. The hydrogens on the bridging methyl groups were found in the Fourier difference maps and refined isotropically.

**11·CH<sub>2</sub>Cl<sub>2</sub>·C<sub>5</sub>H<sub>12</sub>:** Single crystals were grown by a diffusion of pentane into a saturated methylene chloride solution at room temperature. The structure has been reported and complete experimental data is available in the supplementary material for the previous publication. Unit cell parameters are reported in Table 2.

**12·1½CH<sub>2</sub>Cl<sub>2</sub>:** Single crystals were grown from a saturated methylene chloride solution at -35°C. Four *tert*-butyl group were disordered over two positions (0.7 and 0.3 site occupancies) and these carbon atoms were all refined isotropically. One disordered methylene chlorine molecule was "squeezed" from the structure with the Platon for Windows software program while the remaining solvate molecule was disordered across an inversion symmetry position with an overall occupancy factor of 0.25 on this site.

**13·CH<sub>2</sub>Cl<sub>2</sub>·¼C<sub>7</sub>H<sub>8</sub>:** Single crystals were grown from a saturated methylene chloride/pentane solution at -35°C containing a few drops of toluene. The asymmetric unit contained two complete aluminum species, two ordered disordered and two ordered tetraethylammonium cations, two 0.75 occupancy and one 0.5 occupancy dichloromethane

solvates, and one half occupancy toluene molecule. Several of the *tert*-butyl groups were disordered over two positions and they were refined with the necessary site occupancy factors. Experimental unit cell data for the data collection are contained in Table 3.

**14**•2CH<sub>2</sub>Cl<sub>2</sub>: Single crystals were grown from a saturated methylene chloride solution at -35°C. Two disordered dichloromethane solvate molecules were removed ("squeezed") from the data by the Platon for Windows software program. Three of the *tert*-butyl group were disordered in two positions: two groups were modeled with site occupancies of 0.5 while one had occupancy factors of 0.7 and 0.3. Metric parameters are contained in Table 3.

**15**•C<sub>5</sub>H<sub>12</sub>: Single crystals were grown from a saturated methylene chloride/pentane solution at -35°C. A *tert*-butyl group was disordered over two positions and refined with the necessary site occupancy factors. Both **15** and a pentane solvate reside on 2-fold positions. Unit cell information can be located in Table 3.

**16**•2½CH<sub>2</sub>Cl<sub>2</sub>: Single crystals were grown from a saturated methylene chloride solution at -35°C. All disordered *tert*-butyl groups have been modeled over two positions with appropriate occupancy factors. A methylene chloride solvent molecule was modeled at half occupancy while one disordered solvate was removed ("squeezed") from the data by the Platon for Windows software program. Unit cell data is listed in Table 3.

**17**•2CH<sub>2</sub>Cl<sub>2</sub>: Single crystals were grown from a saturated methylene chloride solution at -35°C. One disordered dichloromethane solvate molecule was removed ("squeezed") from the data by the Platon for Windows software program. Disordered *tert*-butyl group were modeled over two positions and refined with various site occupancy factors. Unit cell information is located in Table 3.

**19•4CH<sub>2</sub>Cl<sub>2</sub>:** Single crystals were grown from a saturated methylene chloride solution at -35°C. Unit cell parameters are reported in Table 3.

a) A.L.Spek (2001) PLATON, A Multipurpose Crystallographic Tool, Utrecht University, Utrecht, The Netherlands b) van der Sluis, P; Spek, A. L. *Acta Cryst.* **1990**, *A46*, 194-201

S-

8

Table 1. X-ray data<sup>a</sup> for ligand crystal structures 1 - 4.

|                                                                      | 1-C <sub>5</sub> H <sub>12</sub> -2H <sub>2</sub> O | 2-3CH <sub>3</sub> CN                                         | 3                                               | 4-C <sub>5</sub> H <sub>12</sub>               |
|----------------------------------------------------------------------|-----------------------------------------------------|---------------------------------------------------------------|-------------------------------------------------|------------------------------------------------|
| Total reflections                                                    | 17704                                               | 19999                                                         | 36640                                           | 16426                                          |
| Unique reflections [R(int)]                                          | 11264[0.0820]                                       | 12179[0.0506]                                                 | 11534[0.0431]                                   | 11048[0.0352]                                  |
| Temperature (K)                                                      | 173(2)                                              | 173(2)                                                        | 173(2)                                          | 173(2)                                         |
| Chemical formula                                                     | C <sub>77</sub> H <sub>126</sub> O <sub>6</sub>     | C <sub>70</sub> H <sub>92</sub> N <sub>3</sub> O <sub>5</sub> | C <sub>84</sub> H <sub>111</sub> O <sub>6</sub> | C <sub>63</sub> H <sub>80</sub> O <sub>5</sub> |
| Formula weight                                                       | 1147.78                                             | 1055.47                                                       | 1216.73                                         | 917.27                                         |
| Crystal system                                                       | triclinic                                           | triclinic                                                     | monoclinic                                      | triclinic                                      |
| Space group                                                          | $P\bar{1}$                                          | $P\bar{1}$                                                    | $P2_1/n$                                        | $P\bar{1}$                                     |
| $\mu(\text{Mo-K}\alpha)$ (mm <sup>-1</sup> )                         | 0.070                                               | 0.062                                                         | 0.075                                           | 0.069                                          |
| <i>a</i> (Å)                                                         | 14.4377(12)                                         | 14.5377(8)                                                    | 13.8114(9)                                      | 12.4045(8)                                     |
| <i>b</i> (Å)                                                         | 15.1326(13)                                         | 15.6387(9)                                                    | 29.9961(18)                                     | 13.0644(8)                                     |
| <i>c</i> (Å)                                                         | 15.7110(14)                                         | 18.5314(11)                                                   | 15.809(1)                                       | 18.2881(12)                                    |
| $\alpha$ (°)                                                         | 77.820(2)                                           | 111.716(1)                                                    | -                                               | 106.0450(10)                                   |
| $\beta$ (°)                                                          | 86.244(2)                                           | 91.874(1)                                                     | 91.207(1)                                       | 101.4220(10)                                   |
| $\gamma$ (°)                                                         | 80.759(2)                                           | 114.121(1)                                                    | -                                               | 97.8750(10)                                    |
| <i>V<sub>c</sub></i> (Å <sup>3</sup> )                               | 3309.9(5)                                           | 3487.3(3)                                                     | 6548.1                                          | 2733.4(3)                                      |
| <i>Z</i>                                                             | 2                                                   | 2                                                             | 4                                               | 2                                              |
| <i>R</i> <sub>1</sub> [ <i>I</i> ≥ 2σ( <i>I</i> ) data] <sup>b</sup> | 0.0962 [4181]                                       | 0.689[8290]                                                   | 0.0479[8474]                                    | 0.0705[6240]                                   |
| <i>wR</i> <sub>2</sub> (all data) <sup>c</sup>                       | 0.2375                                              | 0.1913                                                        | 0.1323                                          | 0.2217                                         |
| Largest diff. peak, hole                                             | 0.359, -0.256                                       | 0.530, -0.389                                                 | 0.339, -0.204                                   | 0.555, -0.286                                  |

<sup>a</sup>Obtained with monochromatic Mo Kα radiation ( $\lambda = 0.71073$  Å) at 173K. <sup>b</sup> $R_1 = \Sigma |F_o| - |F_c| / \Sigma |F_o|$ .<sup>c</sup> $wR_2 = \{\Sigma [w(F_o^2 - F_c^2)^2 / \Sigma w(F_o^2)^2]\}^{1/2}$  where  $w = 1/[\sigma^2(F_o^2) + (XP)^2 + YP]$  where  $P = (F_o^2 + 2F_c^2)/3$ .

8

S- 9

Table 2. X-ray structural data<sup>a</sup> for compounds 5 - 11.

|                                                                               | 5-3OCMe <sub>2</sub>                            | 6-2C <sub>3</sub> H <sub>12</sub>                               | 7-3CH <sub>2</sub> Cl <sub>2</sub>                                              | 8-3CH <sub>2</sub> Cl <sub>2</sub>                                              | 9-3C <sub>3</sub> H <sub>12</sub>                               | 10-C <sub>3</sub> H <sub>12</sub> -CH <sub>2</sub> Cl <sub>2</sub>              | 11-C <sub>3</sub> H <sub>12</sub> -CH <sub>2</sub> Cl <sub>2</sub>                             |
|-------------------------------------------------------------------------------|-------------------------------------------------|-----------------------------------------------------------------|---------------------------------------------------------------------------------|---------------------------------------------------------------------------------|-----------------------------------------------------------------|---------------------------------------------------------------------------------|------------------------------------------------------------------------------------------------|
| total reflections                                                             | 19250                                           | 22127                                                           | 42749                                                                           | 44504                                                                           | 18990                                                           | 33009                                                                           | 45513                                                                                          |
| uniq. reflections                                                             | 11705                                           | 13827                                                           | 13377                                                                           | 13646                                                                           | 11472                                                           | 9926                                                                            | 14664                                                                                          |
| <i>R</i> (int)                                                                | 0.0452                                          | 0.0816                                                          | 0.0993                                                                          | 0.1054                                                                          | 0.0868                                                          | 0.0790                                                                          | 0.0437                                                                                         |
| $\Theta_{\max}^{\circ}$                                                       | 24.74                                           | 24.00                                                           | 24.00                                                                           | 25.00                                                                           | 23.00                                                           | 22.50                                                                           | 25.00                                                                                          |
| chemical formula                                                              | C <sub>77</sub> H <sub>104</sub> O <sub>7</sub> | C <sub>90</sub> H <sub>138</sub> O <sub>4</sub> Al <sub>4</sub> | C <sub>81</sub> H <sub>118</sub> O <sub>5</sub> Al <sub>4</sub> Cl <sub>6</sub> | C <sub>78</sub> H <sub>106</sub> O <sub>5</sub> Al <sub>2</sub> Cl <sub>6</sub> | C <sub>89</sub> H <sub>132</sub> O <sub>4</sub> Al <sub>2</sub> | C <sub>78</sub> H <sub>104</sub> O <sub>5</sub> Al <sub>2</sub> Cl <sub>2</sub> | C <sub>87</sub> H <sub>128</sub> O <sub>4</sub> Al <sub>2</sub> Cl <sub>3</sub> N <sub>1</sub> |
| formula weight                                                                | 1141.60                                         | 1391.92                                                         | 1492.37                                                                         | 1390.29                                                                         | 1319.91                                                         | 1246.47                                                                         | 1412.21                                                                                        |
| crystal system                                                                | triclinic                                       | triclinic                                                       | monoclinic                                                                      | monoclinic                                                                      | triclinic                                                       | monoclinic                                                                      | monoclinic                                                                                     |
| space group                                                                   | <i>P</i> $\bar{1}$                              | <i>P</i> $\bar{1}$                                              | <i>P</i> 2 <sub>1</sub> / <i>n</i>                                              | <i>P</i> 2 <sub>1</sub> / <i>c</i>                                              | <i>P</i> $\bar{1}$                                              | <i>P</i> 2 <sub>1</sub> / <i>n</i>                                              | <i>P</i> 2 <sub>1</sub> / <i>c</i>                                                             |
| $\mu$ (Mo-K $\alpha$ ) (mm <sup>-1</sup> )                                    | 0.069                                           | 0.098                                                           | 0.289                                                                           | 0.291                                                                           | 0.082                                                           | 0.155                                                                           | 0.178                                                                                          |
| <i>a</i> (Å)                                                                  | 13.3480(8)                                      | 13.6213(7)                                                      | 16.1000(11)                                                                     | 14.7565(18)                                                                     | 13.652(4)                                                       | 14.5373(10)                                                                     | 15.1245(7)                                                                                     |
| <i>b</i> (Å)                                                                  | 16.5313(10)                                     | 17.3859(9)                                                      | 20.8304(14)                                                                     | 43.043(5)                                                                       | 15.532(5)                                                       | 23.7780(17)                                                                     | 21.2736(10)                                                                                    |
| <i>c</i> (Å)                                                                  | 17.2102(10)                                     | 21.1789(11)                                                     | 26.6007(18)                                                                     | 13.4321(16)                                                                     | 21.088(6)                                                       | 22.6129(16)                                                                     | 26.0590(11)                                                                                    |
| $\alpha$ (°)                                                                  | 80.230(1)                                       | 111.891(1)                                                      | -                                                                               | -                                                                               | 72.037(5)                                                       | -                                                                               | -                                                                                              |
| $\beta$ (°)                                                                   | 73.329(1)                                       | 98.218(1)                                                       | 107.3370(10)                                                                    | 114.592(2)                                                                      | 77.508(6)                                                       | 103.481(2)                                                                      | 95.246(1)                                                                                      |
| $\gamma$ (°)                                                                  | 71.513(1)                                       | 101.501(1)                                                      | -                                                                               | -                                                                               | 82.443(6)                                                       | -                                                                               | -                                                                                              |
| <i>V</i> <sub>c</sub> (Å <sup>3</sup> )                                       | 3437.3(4)                                       | 4428.3(4)                                                       | 8515.8(10)                                                                      | 7557.8(16)                                                                      | 4143(2)                                                         | 7601.2(9)                                                                       | 8349.4(7)                                                                                      |
| <i>Z</i>                                                                      | 2                                               | 2                                                               | 4                                                                               | 4                                                                               | 2                                                               | 4                                                                               | 4                                                                                              |
| <i>R</i> <sub>1</sub> [ <i>I</i> ≥ 2 $\sigma$ ( <i>I</i> ) data] <sup>b</sup> | 0.0622 [5861]                                   | 0.0912 [8243]                                                   | 0.0914 [8210]                                                                   | 0.0878 [7097]                                                                   | 0.0890 [7699]                                                   | 0.0668 [4998]                                                                   | 0.0660 [10122]                                                                                 |
| <i>wR</i> <sub>2</sub> (all data) <sup>c</sup>                                | 0.1705                                          | 0.2510                                                          | 0.2354                                                                          | 0.2104                                                                          | 0.2480                                                          | 0.1910                                                                          | 0.2004                                                                                         |
| Larg. diff. peak, hole                                                        | 0.373, -0.250                                   | 0.369, -0.508                                                   | 0.464, -0.392                                                                   | 0.424, -0.760                                                                   | 0.583, -0.310                                                   | 0.751, -0.332                                                                   | 0.907, -0.434                                                                                  |

<sup>a</sup>Obtained with monochromatic Mo K $\alpha$  radiation ( $\lambda = 0.71073$  Å). <sup>b</sup> $R_1 = \Sigma |F_o| - |F_c| / \Sigma |F_o|$ . <sup>c</sup> $wR_2 = \{\Sigma [w(F_o^2 - F_c^2)^2 / \Sigma [w(F_o^2)]]\}^{1/2}$  where  $w = 1/[\sigma^2(F_o^2) + (XP)^2 + YP]$  where  $P = (F_o^2 + 2F_c^2)/3$ .

9



S- 10

Table 3. X-ray structural data<sup>a</sup> for compounds 12–17, and 19.

|                                                                          | 12-1 $\frac{1}{2}$ CH <sub>2</sub> Cl <sub>2</sub>                                          | 13-CH <sub>2</sub> Cl <sub>2</sub> · $\frac{1}{4}$ C <sub>7</sub> H <sub>8</sub>                  | 14-2CH <sub>2</sub> Cl <sub>2</sub>                                                | 15-C <sub>3</sub> H <sub>12</sub>                                | 16-2 $\frac{1}{2}$ CH <sub>2</sub> Cl <sub>2</sub>                  | 17-2CH <sub>2</sub> Cl <sub>2</sub>                                            | 19-4CH <sub>2</sub> Cl <sub>2</sub>                                             |
|--------------------------------------------------------------------------|---------------------------------------------------------------------------------------------|---------------------------------------------------------------------------------------------------|------------------------------------------------------------------------------------|------------------------------------------------------------------|---------------------------------------------------------------------|--------------------------------------------------------------------------------|---------------------------------------------------------------------------------|
| total reflections                                                        | 72704                                                                                       | 45097                                                                                             | 50022                                                                              | 31360                                                            | 20481                                                               | 22602                                                                          | 22522                                                                           |
| uniq. reflects.                                                          | 11586                                                                                       | 26207                                                                                             | 15819                                                                              | 11338                                                            | 11098                                                               | 14925                                                                          | 13660                                                                           |
| <i>R</i> (int)                                                           | 0.0943                                                                                      | 0.0582                                                                                            | 0.0647                                                                             | 0.0550                                                           | 0.0578                                                              | 0.0433                                                                         | 0.1508                                                                          |
| $\Theta_{\max}^{\circ}$                                                  | 23.50                                                                                       | 22.50                                                                                             | 25.00                                                                              | 28.31                                                            | 23.50                                                               | 28.34                                                                          | 24.75                                                                           |
| chemical formula                                                         | C <sub>81.125</sub> H <sub>116.25</sub> NO <sub>5</sub> Al <sub>2</sub> Cl <sub>3.125</sub> | C <sub>93.75</sub> H <sub>144</sub> Al <sub>2</sub> Cl <sub>4</sub> N <sub>2</sub> O <sub>5</sub> | C <sub>86</sub> H <sub>115</sub> O <sub>6</sub> Al <sub>2</sub> Cl <sub>4</sub> Na | C <sub>101</sub> H <sub>136</sub> O <sub>6</sub> Al <sub>2</sub> | C <sub>77.5</sub> H <sub>100</sub> O <sub>6</sub> AlCl <sub>5</sub> | C <sub>65</sub> H <sub>83</sub> O <sub>6</sub> Al <sub>3</sub> Cl <sub>4</sub> | C <sub>81</sub> H <sub>102</sub> O <sub>5</sub> Al <sub>2</sub> Cl <sub>8</sub> |
| formula weight                                                           | 1350.24                                                                                     | 1574.87                                                                                           | 1463.53                                                                            | 1500.06                                                          | 1331.81                                                             | 1183.05                                                                        | 1493.19                                                                         |
| crystal system                                                           | orthorhombic                                                                                | triclinic                                                                                         | monoclinic                                                                         | monoclinic                                                       | triclinic                                                           | triclinic                                                                      | triclinic                                                                       |
| space group                                                              | <i>Pbca</i>                                                                                 | $P\bar{1}$                                                                                        | <i>C2/c</i>                                                                        | <i>P2<sub>1</sub>/n</i>                                          | $P\bar{1}$                                                          | $P\bar{1}$                                                                     | $P\bar{1}$                                                                      |
| $\mu$ (Mo-K $\alpha$ ) (mm <sup>-1</sup> )                               | 0.192                                                                                       | 0.181                                                                                             | 0.202                                                                              | 0.082                                                            | 0.290                                                               | 0.278                                                                          | 0.351                                                                           |
| <i>a</i> (Å)                                                             | 25.8599(15)                                                                                 | 15.4309(7)                                                                                        | 61.323(4)                                                                          | 16.6001(12)                                                      | 14.214(3)                                                           | 13.0989(14)                                                                    | 14.723(3)                                                                       |
| <i>b</i> (Å)                                                             | 19.8675(12)                                                                                 | 25.6420(13)                                                                                       | 13.5423(8)                                                                         | 11.9328(9)                                                       | 15.116(3)                                                           | 13.2760(14)                                                                    | 15.462(3)                                                                       |
| <i>c</i> (Å)                                                             | 30.5878(18)                                                                                 | 28.1895(14)                                                                                       | 21.6684(11)                                                                        | 24.8710(18)                                                      | 20.095(4)                                                           | 18.315(2)                                                                      | 19.938(4)                                                                       |
| $\alpha$ (°)                                                             | -                                                                                           | 112.4720(1)                                                                                       | -                                                                                  | -                                                                | 104.122(5)                                                          | 95.047(2)                                                                      | 69.973(4)                                                                       |
| $\beta$ (°)                                                              | -                                                                                           | 102.0080(1)                                                                                       | 93.043(1)                                                                          | 109.180(2)                                                       | 106.091(4)                                                          | 91.299(2)                                                                      | 72.995(4)                                                                       |
| $\gamma$ (°)                                                             | -                                                                                           | 90.4490(1)                                                                                        | -                                                                                  | -                                                                | 105.057(4)                                                          | 94.424(2)                                                                      | 74.811(4)                                                                       |
| <i>V<sub>c</sub></i> (Å <sup>3</sup> )                                   | 15715.1(16)                                                                                 | 10034.3(8)                                                                                        | 17969.3(17)                                                                        | 4653.1(6)                                                        | 3766.5(13)                                                          | 3161.9(6)                                                                      | 4011.3(12)                                                                      |
| <i>Z</i>                                                                 | 8                                                                                           | 4                                                                                                 | 8                                                                                  | 2                                                                | 2                                                                   | 2                                                                              | 2                                                                               |
| <i>R</i> <sub>1</sub> [ <i>I</i> ≥ 2 $\sigma$ ( <i>I</i> )] <sup>b</sup> | 0.0849 [8757]                                                                               | 0.0887 [14595]                                                                                    | 0.0596 [10021]                                                                     | 0.0586 [7689]                                                    | 0.0929 [6166]                                                       | 0.0535 [9964]                                                                  | 0.0697 [3091]                                                                   |
| <i>wR</i> <sub>2</sub> (all data) <sup>c</sup>                           | 0.2043                                                                                      | 0.2770                                                                                            | 0.1706                                                                             | 0.1687                                                           | 0.2981                                                              | 0.1538                                                                         | 0.1656                                                                          |
| diff. peak, hole                                                         | 0.476, -0.459                                                                               | 1.066, -0.555                                                                                     | 0.761, -0.286                                                                      | 0.364, -0.378                                                    | 0.862, -0.544                                                       | 0.524, -0.633                                                                  | 0.614, -0.519                                                                   |

<sup>a</sup>Obtained with monochromatic Mo K $\alpha$  radiation ( $\lambda = 0.71073$  Å) at 173 K. <sup>b</sup> $R_1 = \Sigma |F_o| - |F_c| / \Sigma |F_o|$ . <sup>c</sup> $wR_2 = \{\Sigma [w(F_o^2 - F_c^2)^2 / \Sigma w(F_o^2)^2]\}^{1/2}$  where  $w = 1/[\sigma^2(F_o^2) + (XP)^2 + YP]$  where  $P = (F_o^2 + 2F_c^2)/3$ .

10

### Crystallographic Diagrams

The following diagrams are drawn with 30% probability ellipsoids for all atoms in the asymmetric unit of the structure including the solvate molecules. Hydrogen atoms have been omitted for clarity

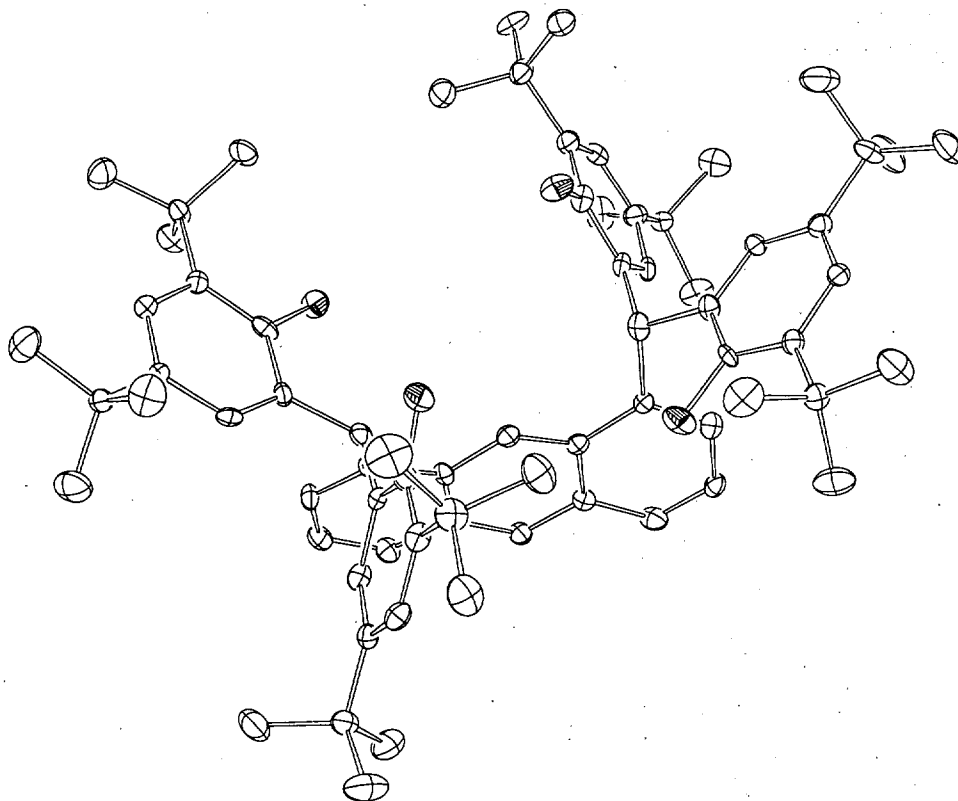

**Compound 1**

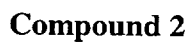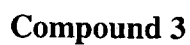

S- 13

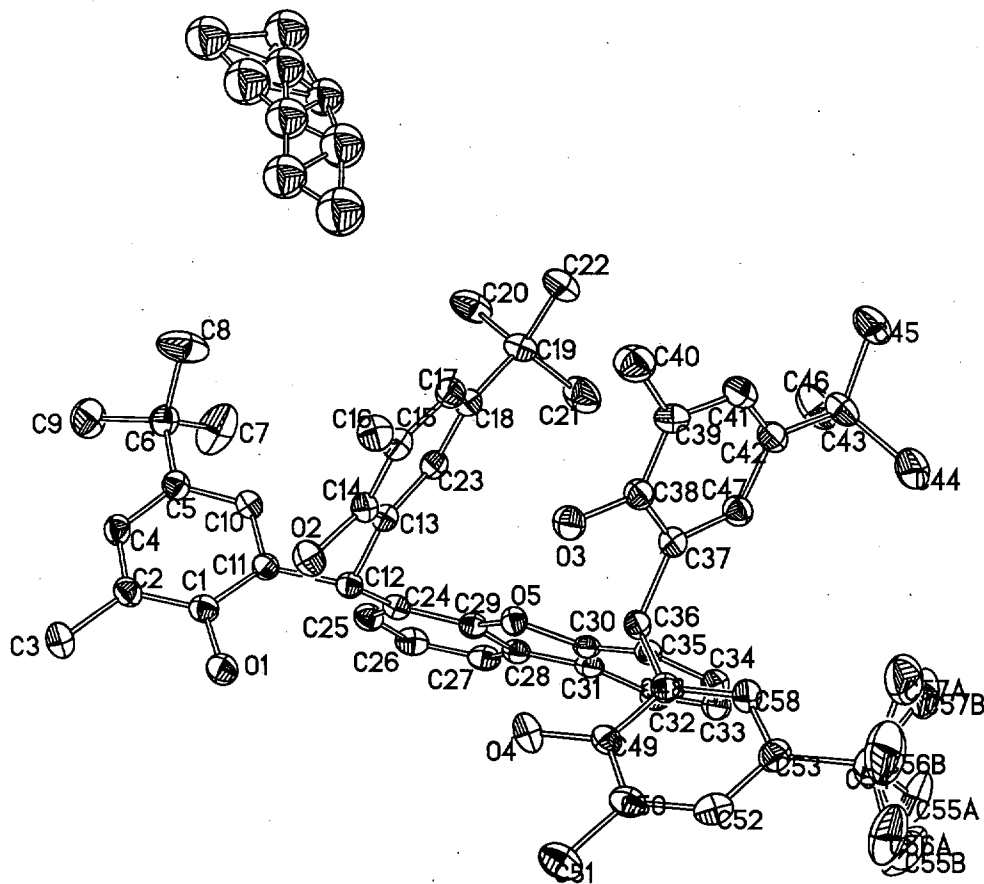

Compound 4

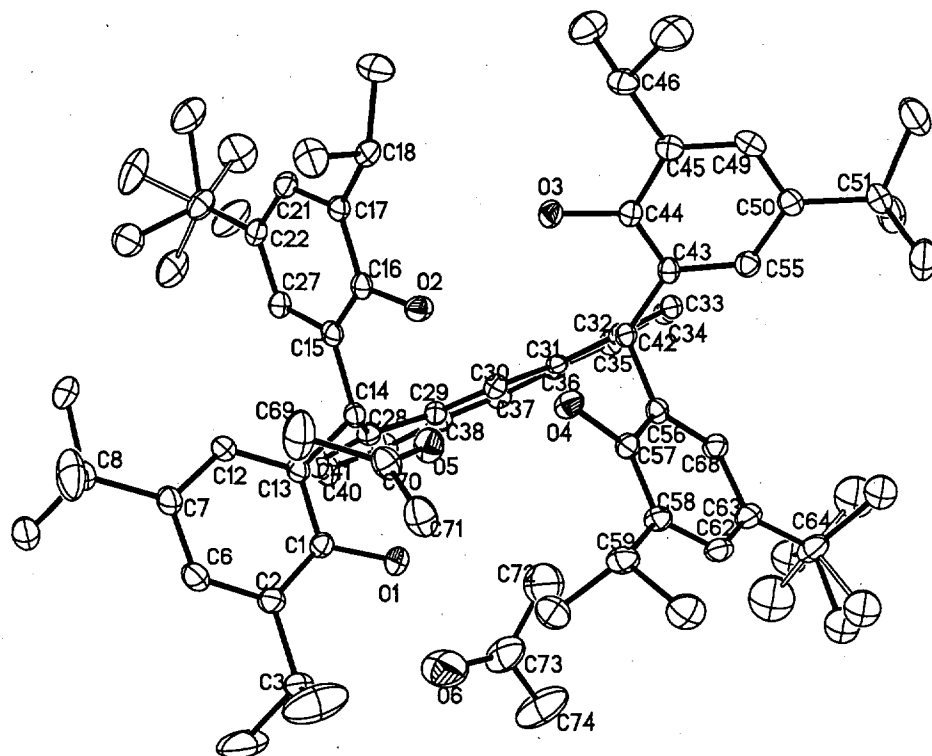

Compound 5

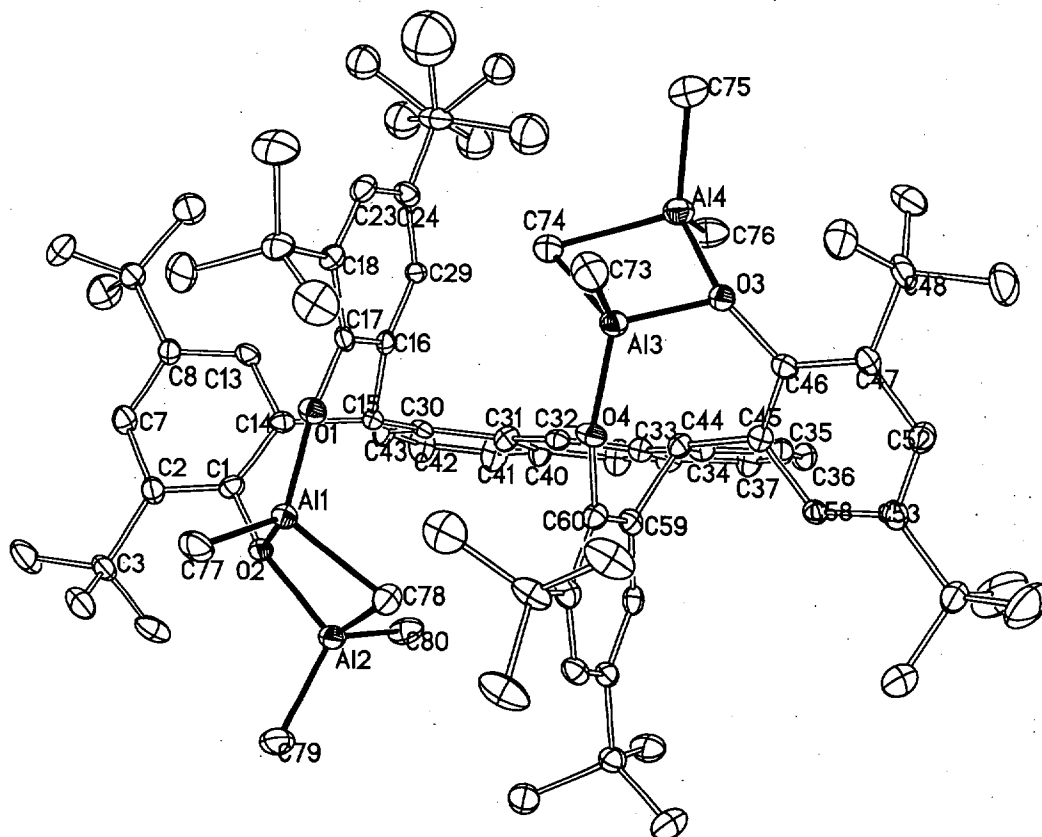

Compound 6

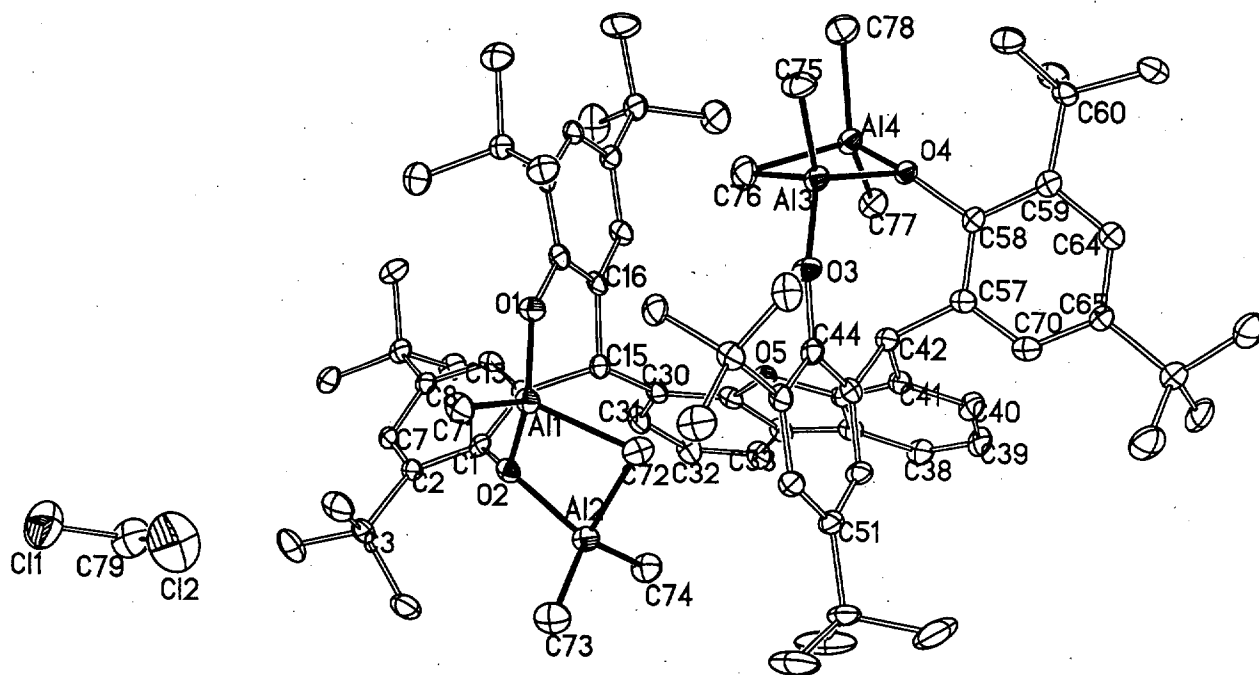

Compound 7

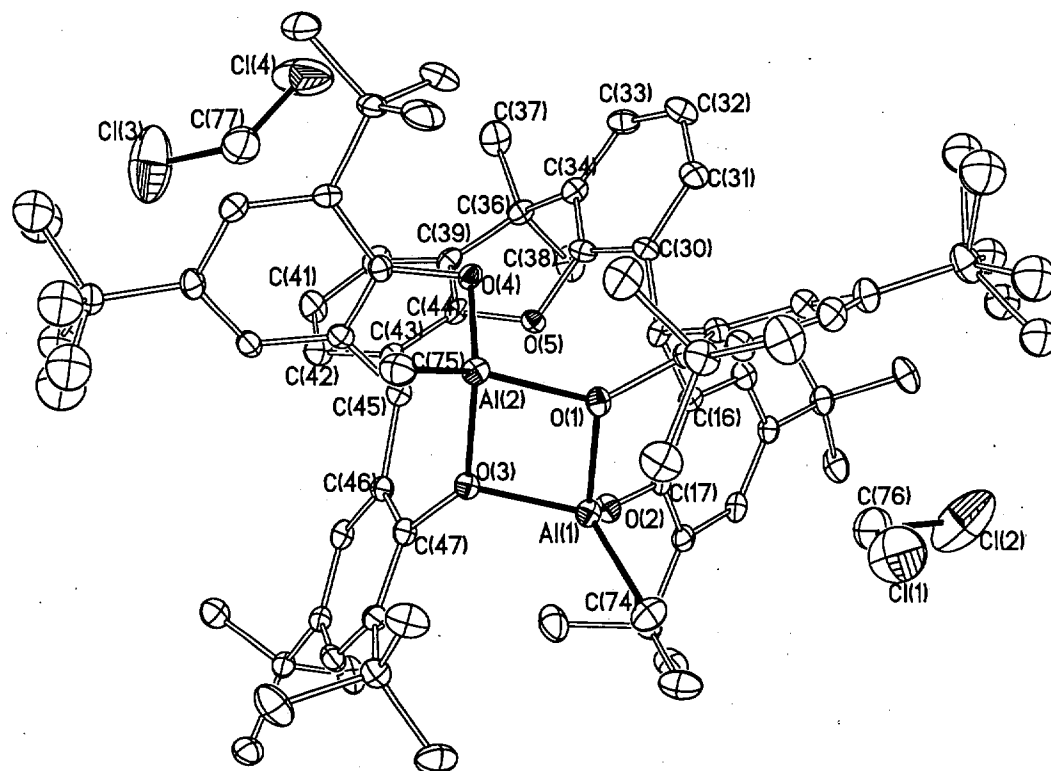

Compound 8

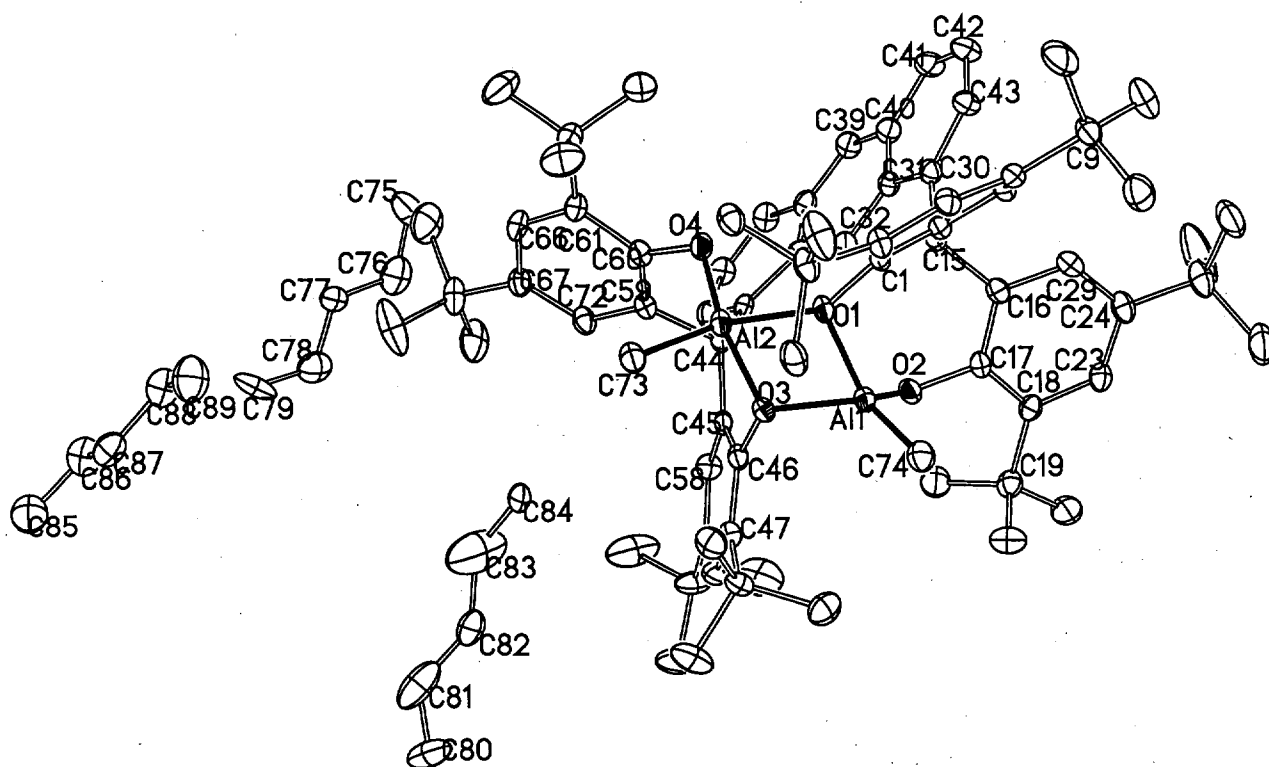

Compound 9

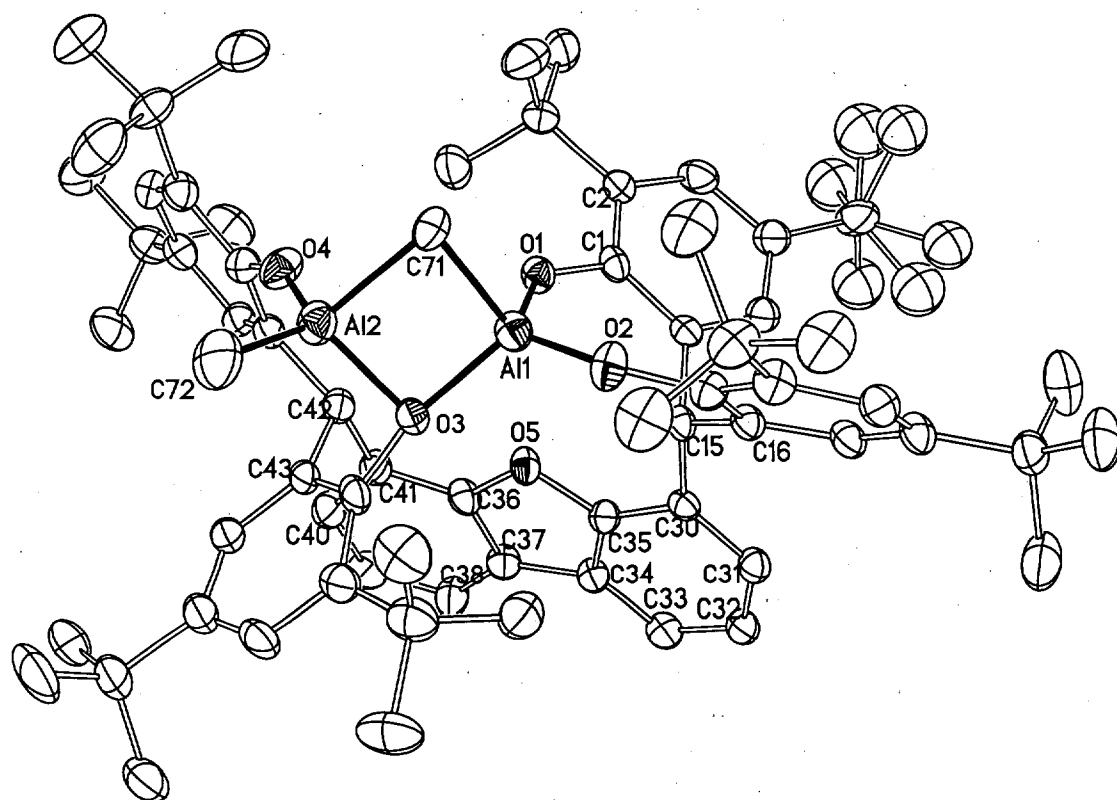

**Compound 10**

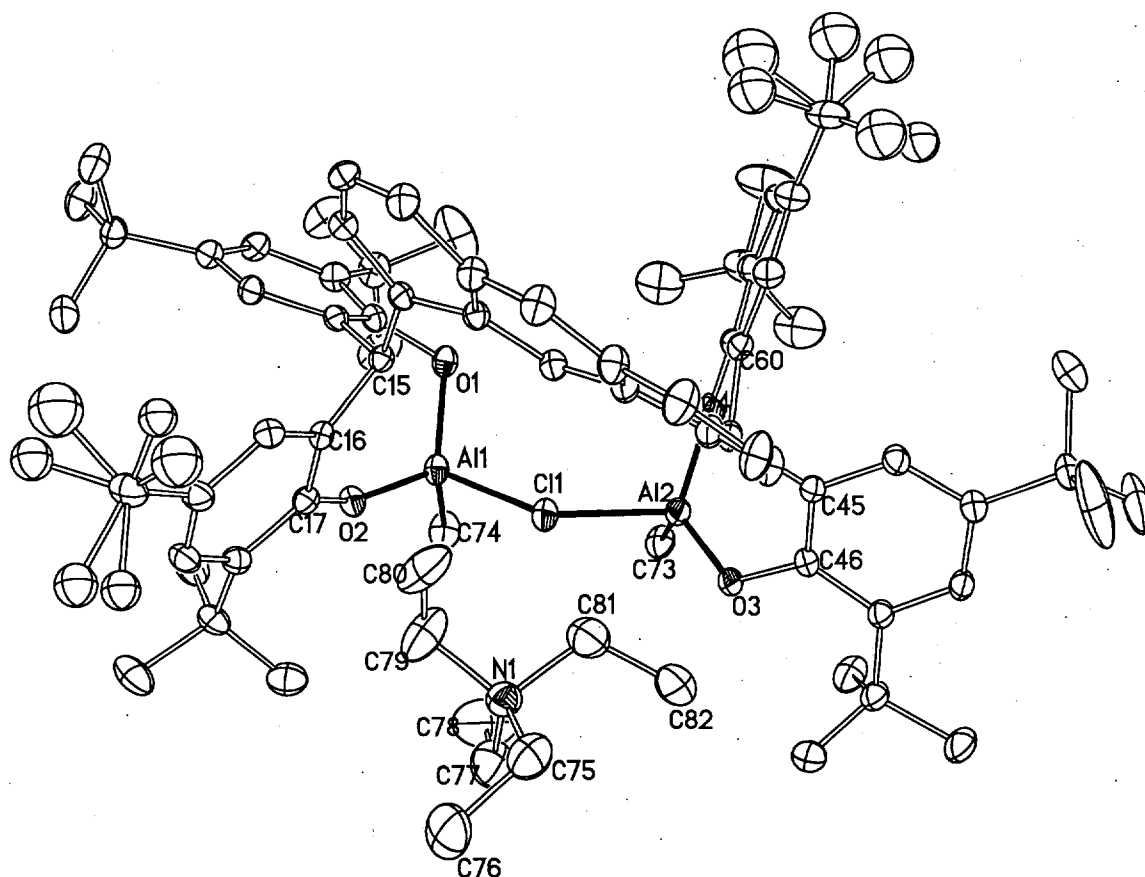

**Compound 11**

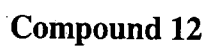



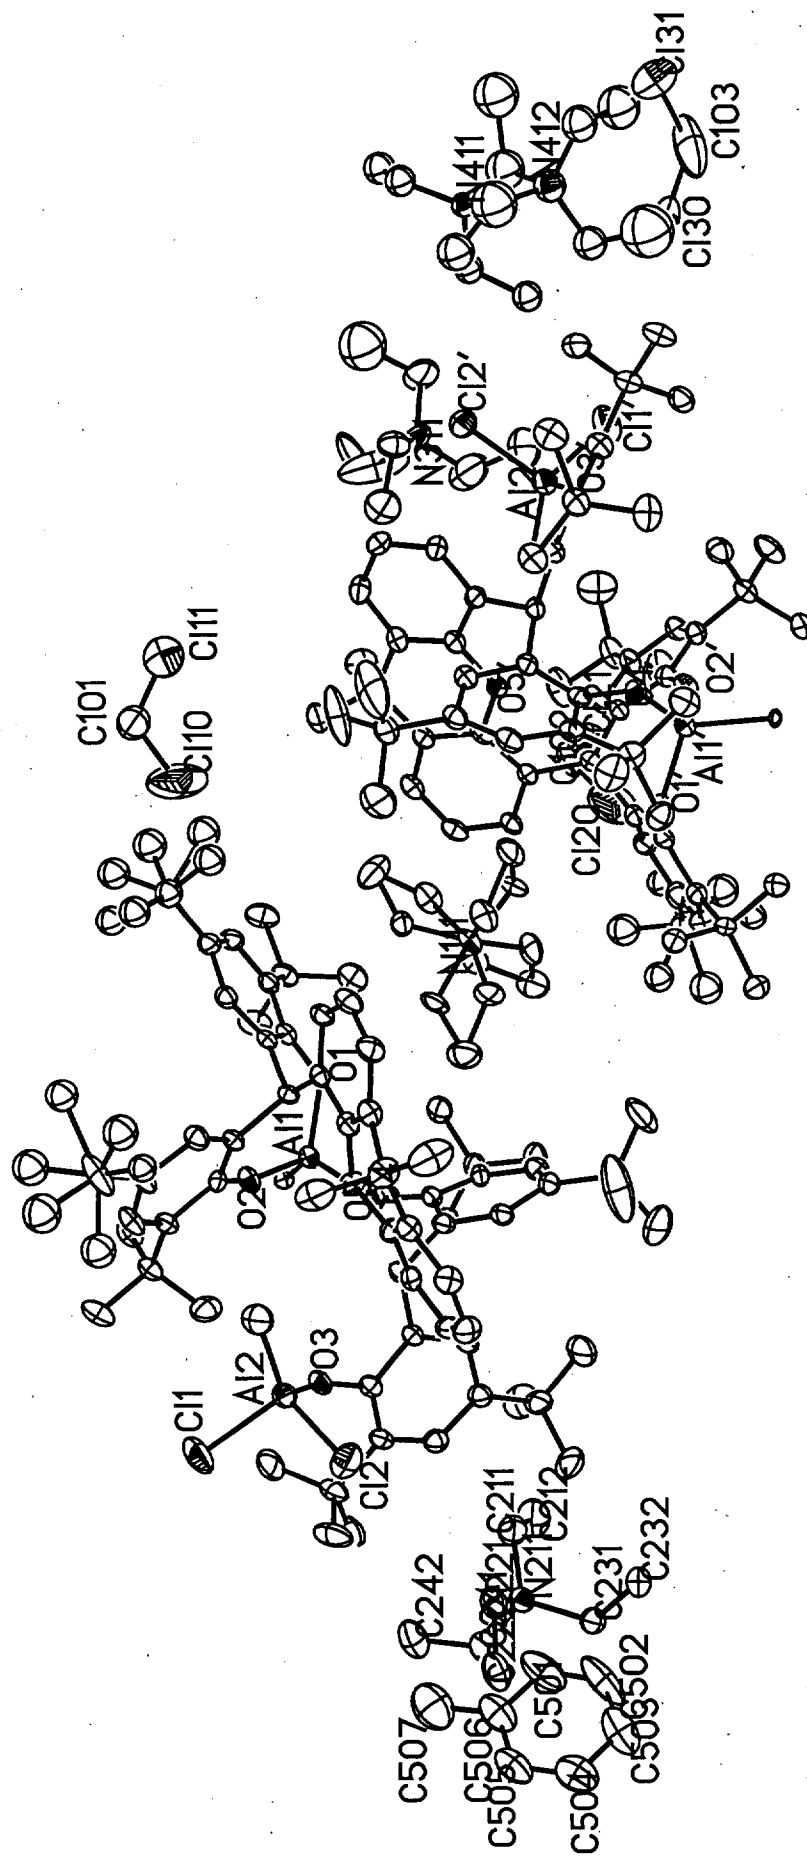

Compound 13

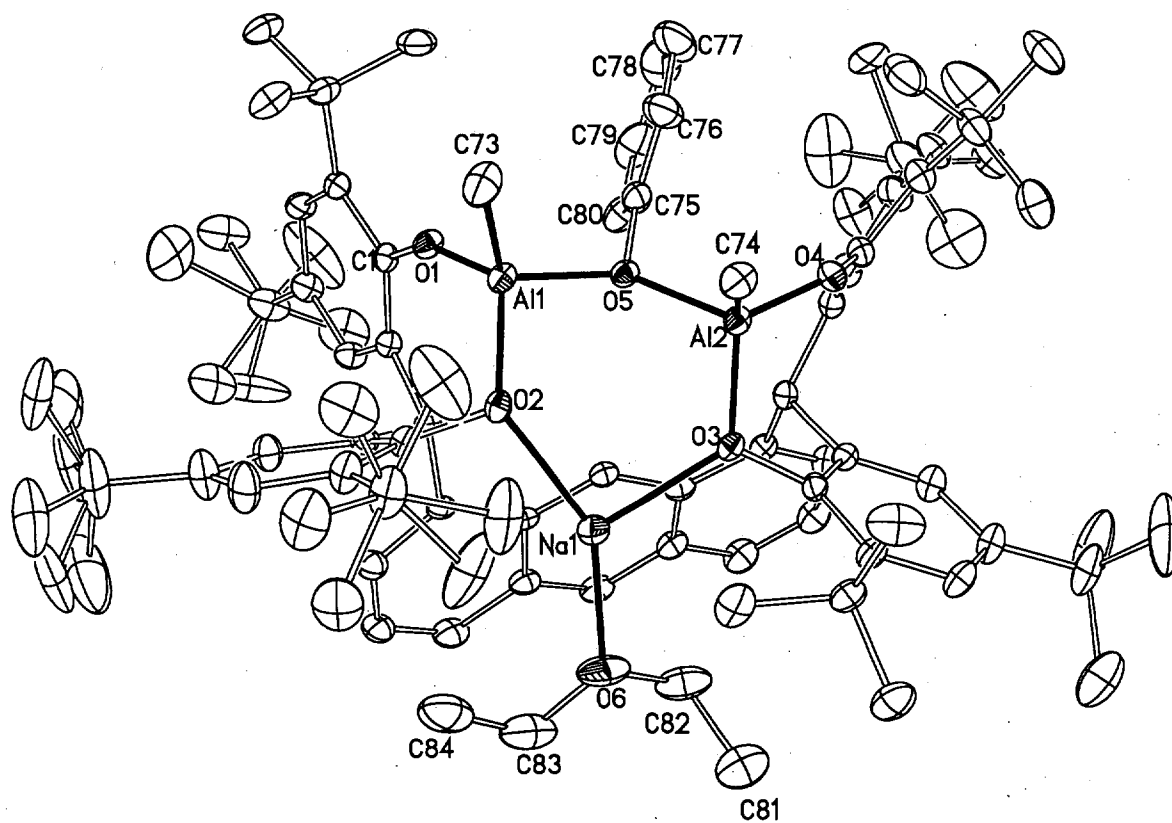

Compound 14

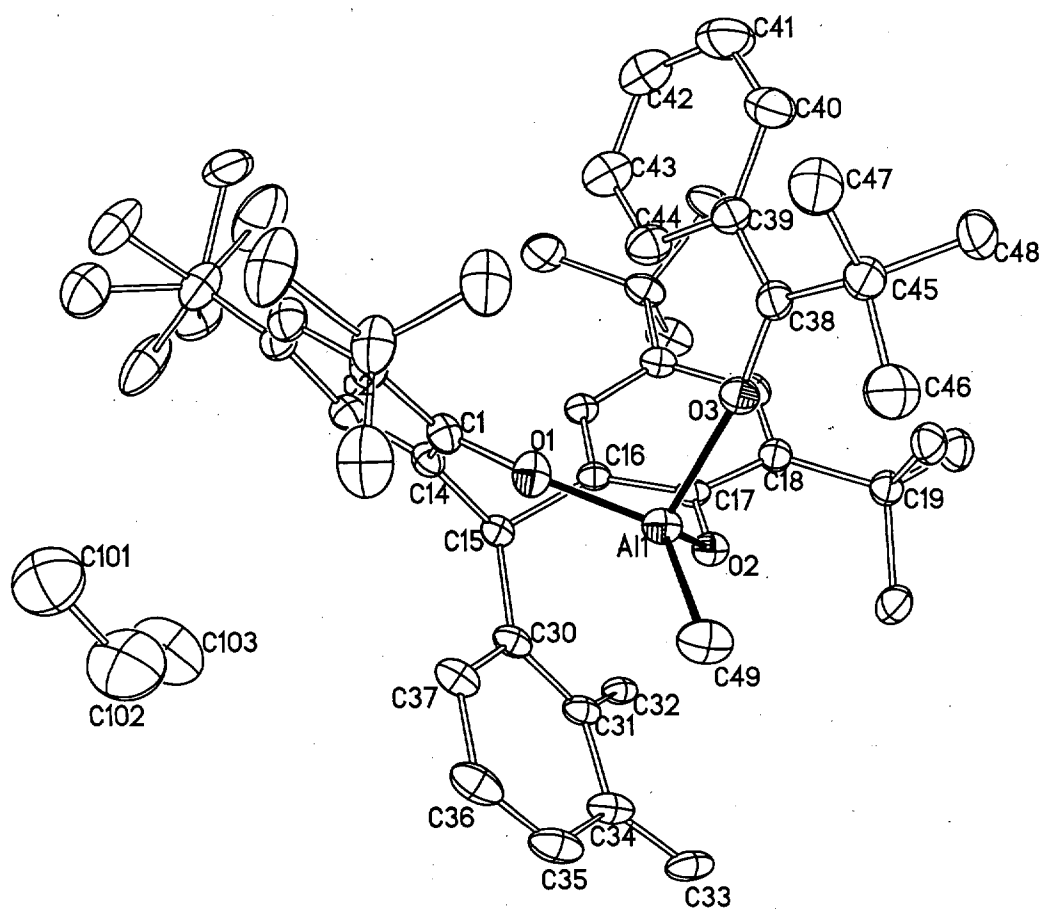

Compound 15

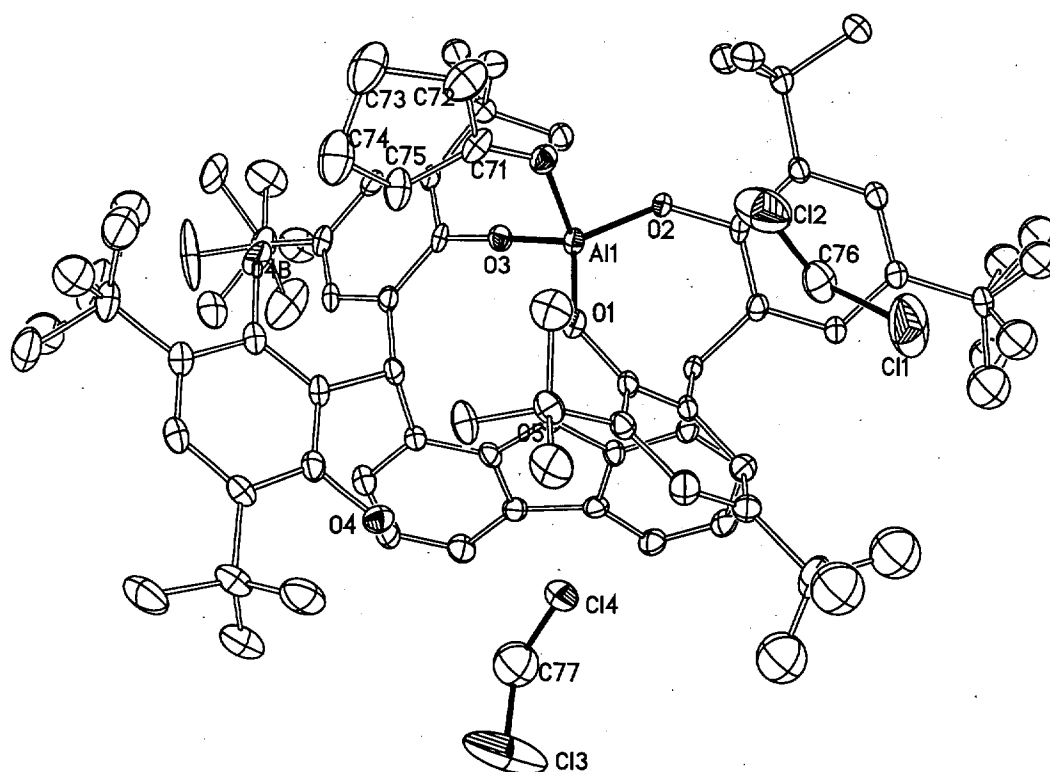

**Compound 16**

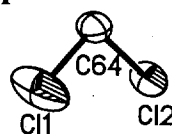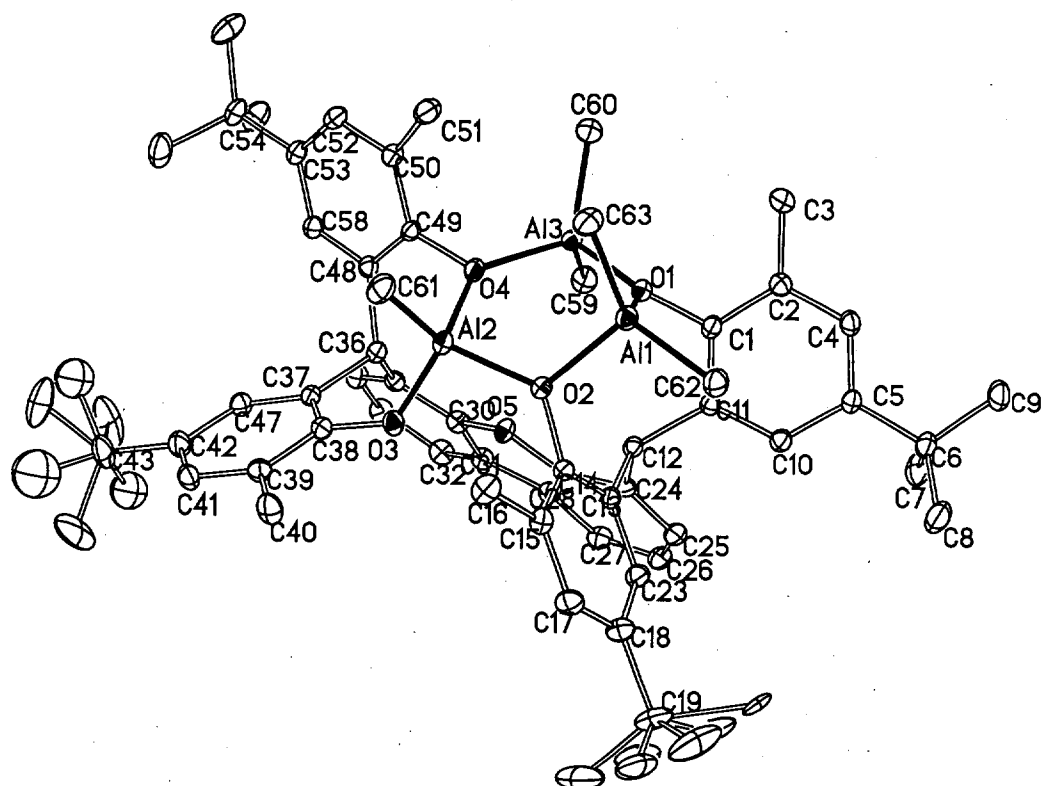

**Compound 17**

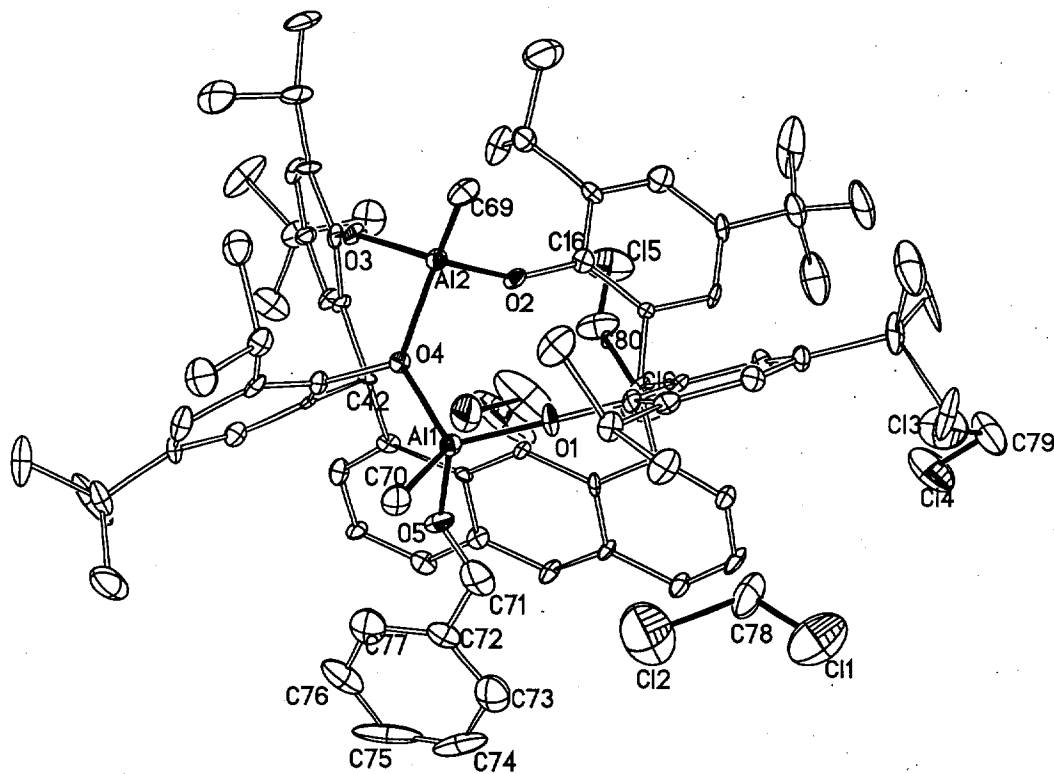

**Compound 19**

---

<sup>1</sup>. Blessing, R. H. *Acta Cryst., Sect. A*, **1995**, *51*, 33-38.

<sup>2</sup> Cottone, A; Scott, M. J. *Organometallics* **2000**, *19*, 5254-5256.
